# Supplementary material
Source: ML conference proceedings conference paper supplement (https://openreview.net/forum?id=Wi74fYCX2f)

# vps\_Gaussian\_cifar10

August 3, 2024

## 1 Computation of the eigenvalues of the covariance associated with CIFAR-10 Gaussian

In this notebook, we compute the Gaussian distribution fitted to the CIFAR-10 dataset and the eigenvalues of the associated covariance matrix. One can replace CIFAR-10 by another dataset.

```
[1]: import torch
import torchvision
import torchvision.transforms as transforms
import matplotlib.pyplot as plt
import os
import scipy
import matplotlib.pyplot as plt
import numpy as np
```

### 1.1 1. Observation of some images of the dataset

```
[2]: transform = transforms.Compose(
    [transforms.ToTensor(), transforms.Normalize((0.5, 0.5, 0.5), (0.5, 0.5, 0.5))])

batch_size = 100

trainset = torchvision.datasets.CIFAR10(root='./data', train=True,
                                         download=True, transform=transform)
trainloader = torch.utils.data.DataLoader(trainset, batch_size=batch_size,
                                           shuffle=False, num_workers=2)

classes = ('plane', 'car', 'bird', 'cat',
           'deer', 'dog', 'frog', 'horse', 'ship', 'truck')

# functions to show an image

def imshow(img):
    img = img / 2 + 0.5    # unnormalize
    npimg = img.numpy()
    plt.figure(figsize=(10,10))
```

```
plt.imshow(np.transpose(npimg, (1, 2, 0)))
plt.show()

# get some random training images
dataiter = iter(trainloader)
images, labels = next(dataiter)

imshow(torchvision.utils.make_grid(images, 10))

_, nc, w, h = images.shape
```

Files already downloaded and verified

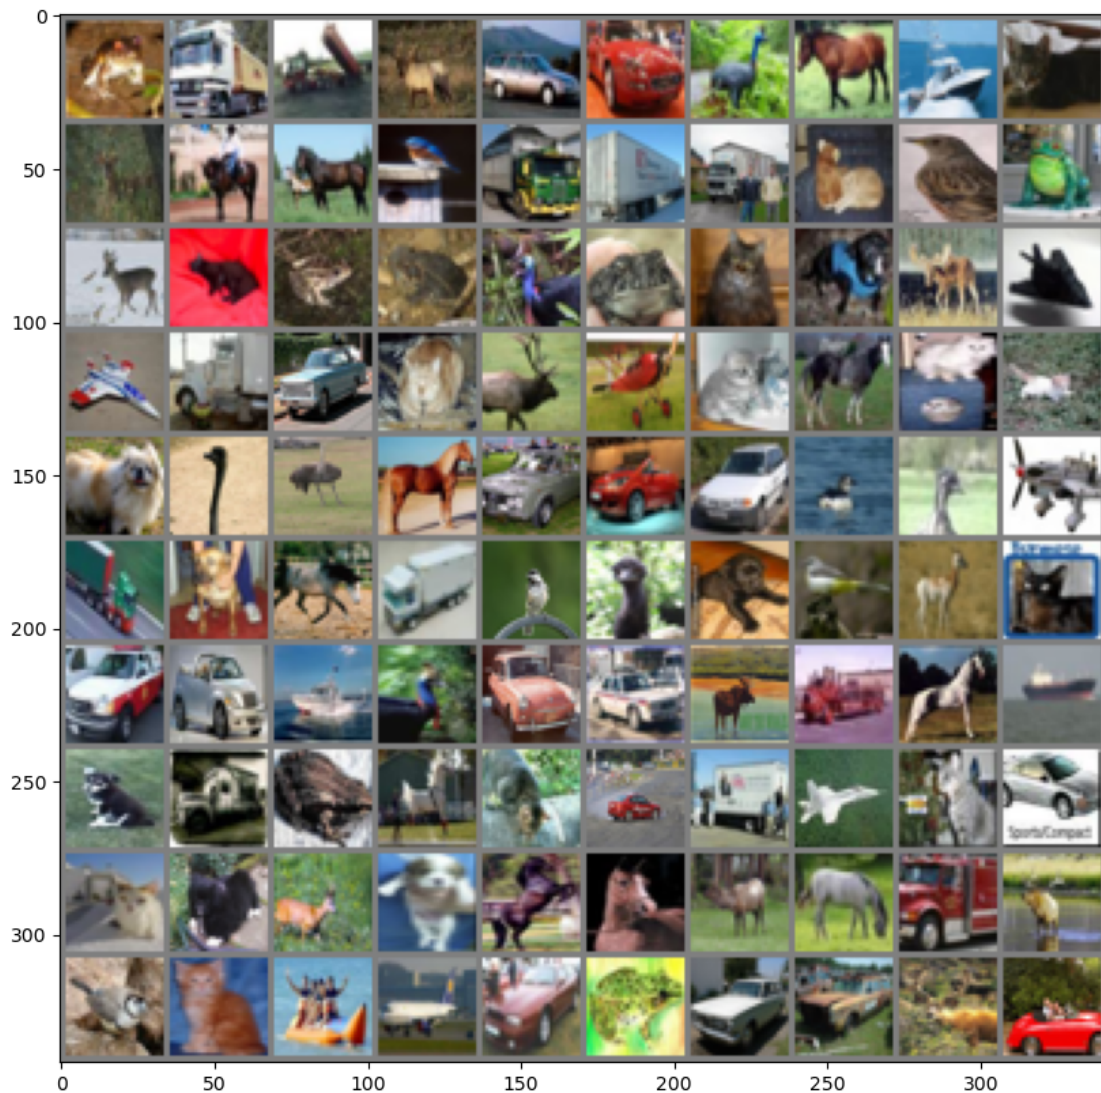

## 1.2 2. Computation of the associated Gaussian

We evaluate the covariance matrix by computing the empirical covariance of the dataset.

```
[3]: #Storage of all the dataset in all_images
num_images = len(trainset)
all_images = torch.empty((len(trainset), nc, w, h))

for i, data in enumerate(trainloader, 0):
    all_images[i*batch_size:(i+1)*batch_size,:,:,:] = data[0]

print('all_images has shape:', all_images.shape)
```

all\_images has shape: torch.Size([50000, 3, 32, 32])

```
[4]: #Computation of the empirical covariance matrix
C = torch.cov(all_images.reshape((num_images, -1)).transpose(0,1))
```

```
[5]: #Computation of the eigenvalues of the covariance matrix
vps,Q = np.linalg.eigh(C)
vps *= (vps > 0.) # due to digital rounding errors
```

```
[6]: plt.title('Eigenvalues of the covariance matrix')
plt.plot(vps, '-x')
```

```
[6]: [<matplotlib.lines.Line2D at 0x13ea27fd0>]
```

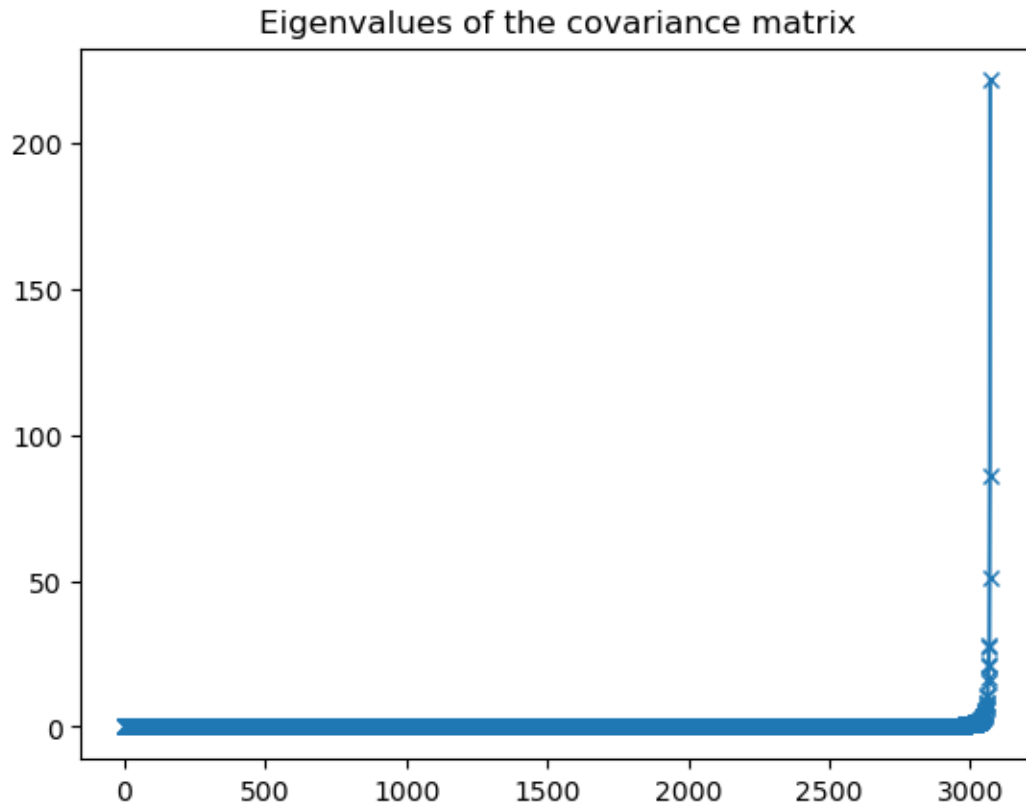

### 1.3 3. Some Gaussian samples

```
[7]: mu = torch.mean(all_images,dim=0)
cholesky_cov = torch.tensor(np.real(scipy.linalg.sqrtm(C)))

batch_size = 100
dim = 3*32*32

samples = mu+torch.mm(torch.randn((batch_size, dim)), cholesky_cov).
↳ reshape(batch_size,3,32,32)

imshow(torchvision.utils.make_grid(samples.clip(-1,1), 10))
```

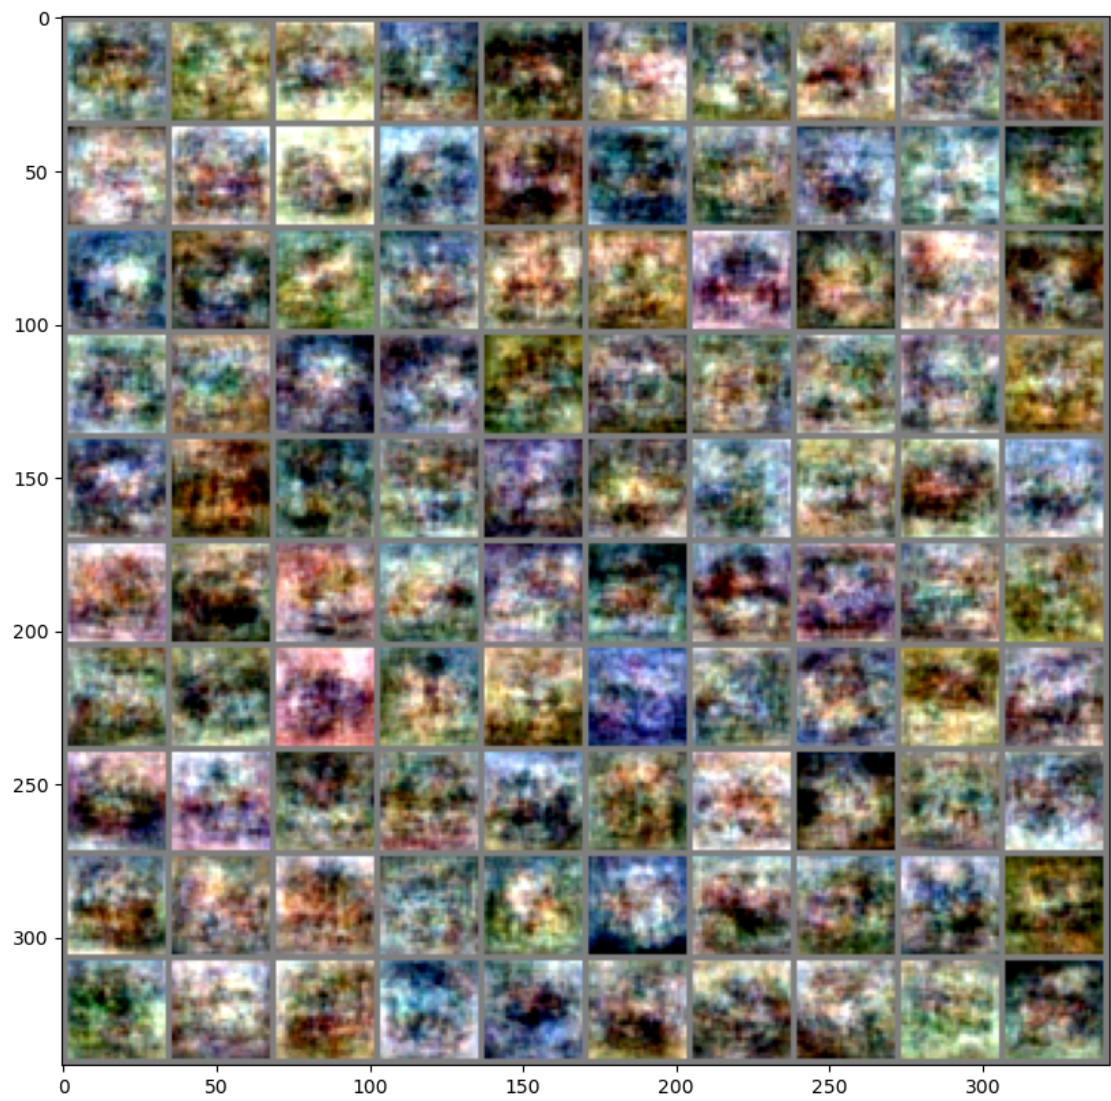

Supplement: supplementary_material [file attachment]
