# Supplementary material
Source: ML conference proceedings conference paper supplement (https://openreview.net/forum?id=Wi74fYCX2f)
Supplement: supplementary_material [file attachment]

# Gaussian\_diffusion\_W2

October 1, 2024

## 1 *Diffusion models for Gaussian distributions: Exact solutions and Wasserstein errors* [ 1 ]

The following code provides figures and table of the article [ 1 ]. You can use it with any covariance matrix (provided eigenvalues can be computed). All details are given to extend our analysis to other numerical schemes.

### 1.0.1 Reminders of the theory

We consider the Variance preserving (VP) forward process:

$$dx_t = -\beta_t x_t dt + \sqrt{2\beta_t} dw_t, \quad 0 \leq t \leq T, \quad x_0 \sim p_{\text{data}}. \quad (1)$$

Supposing that  $p_{\text{data}} = \mathcal{N}(0, \Sigma)$ , the law of  $x_t$  is  $p_t = \mathcal{N}(0, \Sigma_t)$  with

$$\Sigma_t = e^{-2B_t} \Sigma + (1 - e^{-2B_t}) I \quad (2)$$

where  $B_t = \int_0^t \beta_u$  and consequently the score function verifies  $\nabla \log p_t(x) = -\Sigma_t^{-1} x$ .

The associated backward SDE is

$$d\tilde{y}_t = \beta_{T-t}(\tilde{y}_t + 2 \log p_{T-t}(\tilde{y}_t)) dt + \sqrt{2\beta_{T-t}} dw_t, \quad 0 \leq t < T \quad (3)$$

and the reverse flow ODE is

$$d\hat{y}_t = [\beta_{T-t} \hat{y}_t + \beta_{T-t} \nabla_{\hat{y}} \log p_{T-t}(\hat{y}_t)] dt, \quad 0 \leq t < T. \quad (4)$$

We study the errors of the diffusion models by studying the Wasserstein-2 distance. For two centered Gaussians  $\mathcal{N}(0, \Sigma_1)$  and  $\mathcal{N}(0, \Sigma_2)$  such that  $\Sigma_1, \Sigma_2$  are simultaneously diagonalizable with respective eigenvalues  $(\lambda_{i,1})_{1 \leq i \leq d}$  and  $(\lambda_{i,2})_{1 \leq i \leq d}$ ,

$$\mathbf{W}_2(\mathcal{N}(0, \Sigma_2), \mathcal{N}(0, \Sigma_1)) = \sqrt{\sum_{1 \leq i \leq d} (\sqrt{\lambda_{i,1}} - \sqrt{\lambda_{i,2}})^2}. \quad (5)$$

```
[1]: def W2(lamb1,lamb2) :  
      return np.sqrt ( np.sum( (np.sqrt(lamb1)-np.sqrt(lamb2))**2 ) )
```

## 1.1 Packages

```
[ ]: !pip install scienceplots
```

```
[3]: import pylab as plt
import numpy as np
import scienceplots
plt.style.use('science')
from IPython.display import display, Markdown
import os
plt.rcParams.update(plt.rcParamsDefault)
```

## 2 Load data

The Gaussian distribution is known through the eigenvalues of its covariance matrix  $\Sigma$ . `cifar10.npy` corresponds to the Gaussian distribution fitted to the CIFAR-10 dataset. This the list of empirical covariance eigenvalues of the normalized images of the dataset. `ADSN.npy` corresponds to the ADSN distribution described in the paper.

```
[4]: PATH_data = './'

lamb = np.load(PATH_data+'cifar10.npy')
# or lamb = np.load(PATH_data+'ADSN.npy')
```

Bellow, you can choose the outputs path.

```
[5]: PATH_output = './'
```

### 2.1 Parametrization

Let consider  $\beta_t$  linear of the form:  $\beta_t = t \mapsto \beta_{\min} + (\beta_{\max} - \beta_{\min})t$  with  $\beta_{\min} = 0.05$  and  $\beta_{\max} = 10$ . The values are from [ 2 ], up to a factor 2 to be consistent with our VP SDE. We introduce also

$$B_t = \int_0^t \beta_u du = \beta_{\min}t + (\beta_{\max} - \beta_{\min}) \frac{t^2}{2}.$$

```
[6]: T = 1.
beta_min = 0.1/2
beta_max = 20/2

def beta(t) :
    return beta_min + t*(beta_max-beta_min)

def B(t) :
    return beta_min*t + (beta_max-beta_min)*t**2/2
```

### 3 Forward process

$p_t = \mathcal{N}(0, \Sigma_t)$  with  $\Sigma_t = e^{-2B_t}\Sigma + (1 - e^{-2B_t})I$ . Let consider the eigenvalues of  $(\lambda_i)_{1 \leq i \leq d}$  of  $\Sigma$ .  $\Sigma_t$  is diagonalizable in the same orthonormal basis and the  $i$ th eigenvalue of  $\Sigma_t$  is

$$\lambda_i^t = e^{-2B_t}\lambda_i + (1 - e^{-2B_t}). \quad (6)$$

```
[7]: def lamb_Sigma_t(lamb,t) :
      ebt = np.exp(-2*B(t))
      return ebt*lamb+(1-ebt)
```

### 4 Continuous Initialization error

#### 4.0.1 Continuous SDE

With an initialization  $\tilde{y}_0 \sim \mathcal{N}(0, I)$ , the solution  $y_t$  of Equation (3) follows the law  $\tilde{q}_t = \tilde{p}_{T-t}$  where  $\tilde{p}_t$  is the Gaussian distribution  $\mathcal{N}(0, \tilde{\Sigma}_t)$  and

$$\tilde{\Sigma}_t = \Sigma_t + e^{-2(B_T-B_t)}\Sigma_t^2\Sigma_T^{-1}(\Sigma_T^{-1} - I). \quad (7)$$

Consequently,  $\tilde{\Sigma}_t$  is diagonalizable and we can compute its eigenvalues as follows.

```
[8]: def lamb_SDE_t(lamb,t) :

      lamb_t = lamb_Sigma_t(lamb,t)
      lamb_T = lamb_Sigma_t(lamb,T)

      return lamb_t*np.exp(-2*(B(T)-B(t)))*lamb_t**2/lamb_T*(1/lamb_T-1)
```

#### 4.0.2 Continuous ODE

With an initialization  $\hat{y}_0 \sim \mathcal{N}(0, I)$ , the solution  $\hat{y}_t$  of Equation (4) follows the law  $\hat{q}_t = \hat{p}_{T-t}$  where  $\hat{p}_t$  is the Gaussian distribution  $\mathcal{N}(0, \hat{\Sigma}_t)$  and

$$\hat{\Sigma}_t = \Sigma_T^{-1}\Sigma_t. \quad (8)$$

Consequently,  $\hat{\Sigma}_t$  is diagonalizable and we can compute its eigenvalues as follows.

```
[9]: def lamb_ODE_t(lamb,t) :

      lamb_t = lamb_Sigma_t(lamb,t)
      lamb_T = lamb_Sigma_t(lamb,T)

      return lamb_t/lamb_T
```

## 5 Discretization of the equations

### 5.1 Discretization of the backward SDE

Under Gaussian assumption, Equation (3) becomes:

$$d\tilde{y}_t = \beta_{T-t}(\tilde{y}_t - 2\Sigma_{T-t}^{-1}(\tilde{y}_t))dt + \sqrt{2\beta_{T-t}}dw_t, \quad 0 \leq t < T. \quad (9)$$

We study the Euler-Maruyama's scheme (EM) and the Exponential Integrator scheme (EI).

#### 5.1.1 Euler Maruyama's scheme

The EM discretization of Equation (9) is

$$y^{\text{EM},k+1} = y^{\text{EM},k} + \Delta_t \beta_{T-t_k} \left( y_k - 2\Sigma_{T-t_k}^{-1} y^{\text{EM},k} \right) + \sqrt{2\Delta_t \beta_{T-t_k}} z_k, \quad z_k \sim \mathcal{N}_0. \quad (10)$$

Consequently, the  $i$ th eigenvalue  $\lambda_i^{\text{EM},k}$  of the covariance matrix of  $(y^{k,\text{EM}})_{0 \leq k \leq N-1}$  verifies

$$\lambda_i^{\text{EM},k+1} = \left( 1 + \Delta_t \beta_{T-t_k} \left( 1 - \frac{2}{\lambda_i^{T-t_k}} \right) \right)^2 \lambda_i^{\text{EM},k} + 2\Delta_t \beta_{T-t_k} \quad (11)$$

with  $\lambda_i^t$   $i$ th eigenvalue of  $\Sigma_t$  and  $\lambda_i^{\text{EM},0}$  initialized at 1 or  $\lambda_i^T$  depending on the choice of initialization. The following compute the Wasserstein error at each step.

```
[10]: def W2_EM(N,lamb,t_eps=0,p_T = False,all_t = True) :

    tk = np.array([(T-t_eps)*k/(N-1) for k in range(N)])
    Delta_t = tk[1]-tk[0]

    #Initialization at p_T
    if p_T :
        lamb_EM = lamb_Sigma_t(lamb,T)
    #Initialization at N_0
    else :
        lamb_EM = np.ones_like(lamb)

    if all_t :
        W2_EM_list = [W2(lamb_EM,lamb_Sigma_t(lamb,T))]

    for k in range(N-1) :
        lamb_T_tk = lamb_Sigma_t(lamb,T-tk[k])
        beta_T_tk = beta(T-tk[k])

        lamb_EM = (1+Delta_t*beta_T_tk*(1-2/lamb_T_tk))**2*lamb_EM +
        ↪ 2*Delta_t*beta_T_tk

        if all_t :
            W2_EM_list.append(W2(lamb_EM,lamb_Sigma_t(lamb,T-tk[k+1])))
```

```

if all_t :
    W2_EM_list.reverse()
    return W2_EM_list

else :
    return W2(lamb_EM,lamb)

```

### 5.1.2 Exponential Integrator (EI) scheme

The EI discretization of Equation (9) is

$$y^{\text{EI},k+1} = y^{\text{EI},k} + \gamma_{1,k} \left( y^{\text{EI},k+1} - 2\Sigma_{T-t_k}^{-1} y^{\text{EI},k} \right) + \sqrt{2\gamma_{2,k}} z_k \quad z_k \sim \mathcal{N}_0 \quad (12)$$

with  $\gamma_{1,k} = \exp(B_{T-t_k} - B_{T-t_{k+1}}) - 1$  and  $\gamma_{2,k} = \frac{1}{2} [\exp(2(B_{T-t_k} - B_{T-t_{k+1}})) - 1]$ .

Consequently, the  $i$ th eigenvalue  $\lambda_i^{\text{EI},k}$  of the covariance matrix of  $(y^{k,\text{EI}})_{0 \leq k \leq N-1}$  verifies

$$\lambda_i^{\text{EI},k+1} = \left( 1 + \gamma_{1,k} \left( 1 - \frac{2}{\lambda_i^{T-t_k}} \right) \right)^2 \lambda_i^{\text{EI},k} + 2\gamma_{2,k} \quad (13)$$

with  $\lambda_i^t$   $i$ th eigenvalue of  $\Sigma_t$  and  $\lambda_i^{\text{EI},0}$  initialized at 1 or  $\lambda_i^T$  depending on the choice of initialization. The following compute the Wasserstein error at each step.

```

[11]: def W2_EI(N,lamb,t_eps=0,p_T = False,all_t = True) :

    tk = np.array([(T-t_eps)*k/(N-1) for k in range(N)])
    Delta_t = tk[1]-tk[0]

    #Initialization at p_T
    if p_T :
        lamb_EI = lamb_Sigma_t(lamb,T)
    #Initialization at N_0
    else :
        lamb_EI = np.ones_like(lamb)

    if all_t :
        W2_EI_list = [W2(lamb_EI,lamb_Sigma_t(lamb,T))]

    for k in range(N-1) :
        gamma_1_k = np.exp(B(T-tk[k])-B(T-tk[k+1]))-1
        gamma_2_k = (np.exp(2*(B(T-tk[k])-B(T-tk[k+1]))))-1)/2

        lamb_T_tk = lamb_Sigma_t(lamb,T-tk[k])

        beta_T_tk = beta(T-tk[k])

```

```

    lamb_EI = (1+gamma_1_k*(1-2/lamb_T_tk))**2*lamb_EI + 2*gamma_2_k

    if all_t :

        W2_EI_list.append(W2(lamb_EI,lamb_Sigma_t(lamb,T-tk[k+1])))

if all_t :
    W2_EI_list.reverse()

    return W2_EI_list

else :

    return W2(lamb_EI,lamb)

```

## 5.2 Discretization of the flow ODE

Under Gaussian assumption, Equation (4) becomes

$$d\hat{y}_t = \left[ \beta_{T-t} \hat{y}_t - \beta_{T-t} \Sigma_{T-t}^{-1} (\hat{y}_t) \right] dt, \quad 0 \leq t < T. \quad (14)$$

We study the Euler scheme and the Heun's scheme.

## 5.3 Euler scheme

The EM discretization of Equation (14) is

$$y^{\text{Euler},k+1} = y^{\text{Euler},k} + \Delta_t \beta_{T-t_k} \left( y^{\text{Euler},k} - \Sigma_{T-t_k}^{-1} y^{\text{Euler},k} \right). \quad (15)$$

Consequently, the  $i$ th eigenvalue  $\lambda_i^{\text{Euler},k}$  of the covariance matrix of  $(y^{k,\text{Euler}})_{0 \leq k \leq N-1}$  verifies

$$\lambda_i^{\text{Euler},k+1} = \left( 1 + \Delta_t \beta_{T-t_k} \left( 1 - \frac{1}{\lambda_i^{T-t_k}} \right) \right)^2 \lambda_i^{\text{Euler},k} \quad (16)$$

with  $\lambda_i^t$   $i$ th eigenvalue of  $\Sigma_t$  and  $\lambda_i^{\text{Euler},0}$  initialized at 1 or  $\lambda_i^T$  depending on the choice of initialization. The following compute the Wasserstein error at each step.

```

[12]: def W2_Euler(N,lamb,t_eps=0,p_T = False,all_t = True) :

    tk = np.array([(T-t_eps)*k/(N-1) for k in range(N)])
    Delta_t = tk[1]-tk[0]

    #Initialization at p_T
    if p_T :
        lamb_Euler = lamb_Sigma_t(lamb,T)
    #Initialization at N_0

```

```

else :
    lamb_Euler = np.ones_like(lamb)

if all_t :
    W2_Euler_list = [W2(lamb_Euler,lamb_Sigma_t(lamb,T))]

for k in range(N-1) :
    lamb_T_tk = lamb_Sigma_t(lamb,T-tk[k])
    beta_T_tk = beta(T-tk[k])

    lamb_Euler = (1+Delta_t*beta_T_tk*(1-1/lamb_T_tk))*2*lamb_Euler

    if all_t :
        W2_Euler_list.append(W2(lamb_Euler,lamb_Sigma_t(lamb,T-tk[k+1])))

if all_t :
    W2_Euler_list.reverse()

return W2_Euler_list

else :

return W2(lamb_Euler,lamb)

```

## 5.4 Heun's scheme

The EM discretization of Equation (14) is

$$\begin{aligned}
 y^{k+1/2,\text{Heun}} &= y^{k,\text{Heun}} + \Delta_t \beta_{T-t_k} \left( y^{k,\text{Heun}} - \Sigma_{T-t_k}^{-1} y^{k,\text{Heun}} \right) \\
 y^{k+1,\text{Heun}} &= y^{k,\text{Heun}} + \frac{\Delta_t}{2} \beta_{T-t_k} \left( y^{k,\text{Heun}} - \Sigma_{T-t_k}^{-1} y^{k,\text{Heun}} \right) + \frac{\Delta_t}{2} \beta_{T-t_{k+1}} \left( y^{k+1/2,\text{Heun}} - \Sigma_{T-t_{k+1}}^{-1} y^{k+1/2,\text{Heun}} \right).
 \end{aligned}
 \tag{17}$$

Consequently, the  $i$ th eigenvalue  $\lambda_i^{\text{Heun},k}$  of the covariance matrix of  $(y^{k,\text{Heun}})_{0 \leq k \leq N-1}$  verifies

$$\lambda_i^{k+1,\text{Heun}} = \left( 1 + \frac{\Delta_t}{2} \beta_{T-t_k} \left( 1 - \frac{1}{\lambda_i^{T-t_k}} \right) + \frac{\Delta_t}{2} \beta_{T-t_{k+1}} \left( 1 - \frac{1}{\lambda_i^{T-t_{k+1}}} \right) \left( 1 + \Delta_t \beta_{T-t_k} \left( 1 - \frac{1}{\lambda_i^{T-t_k}} \right) \right) \right)^2 \lambda_i^{k,\text{Heun}}
 \tag{18}$$

with  $\lambda_i^t$   $i$ th eigenvalue of  $\Sigma_t$ . With  $\lambda_i^{\text{Heun},0}$  initialized at 1 or  $\lambda_i^T$  depending on the choice of initialization.

```

[13]: def W2_Heun(N,lamb,t_eps=0,p_T = False,all_t = True) :
    tk = np.array([(T-t_eps)*k/(N-1) for k in range(N)])
    Delta_t = tk[1]-tk[0]

```

```

#Initialization at p_T
if p_T :
    lamb_Heun = lamb_Sigma_t(lamb,T)
#Initialization at N_0
else :
    lamb_Heun = np.ones_like(lamb)

if all_t :
    W2_Heun_list = [W2(lamb_Heun,lamb_Sigma_t(lamb,T))]

for k in range(N-1) :
    lamb_T_tk = lamb_Sigma_t(lamb,T-tk[k])
    beta_T_tk = beta(T-tk[k])

    lamb_T_tk_1 = lamb_Sigma_t(lamb,T-tk[k+1])
    beta_T_tk_1 = beta(T-tk[k+1])

    lamb_Heun =(1+ Delta_t/2*beta_T_tk*(1-1/lamb_T_tk)+Delta_t/
↪2*beta_T_tk_1*(1-1/lamb_T_tk_1)*(1+Delta_t*beta_T_tk*(1-1/
↪lamb_T_tk)))*2*lamb_Heun

    if all_t :
        W2_Heun_list.append(W2(lamb_Heun,lamb_T_tk_1 ))

if all_t :
    W2_Heun_list.reverse()

    return W2_Heun_list

else :

    return W2(lamb_Heun,lamb)

```

## 6 Error graphs

Bellow, the code to plot the Figure 1 of [ 1 ] showing the Wasserstein value of the discretization, the initialization along the time and the truncation error.

### 6.0.1 Discretization and initialization

```

[14]: T = 1
      N = 1000
      tk = np.array([T*k/(N-1) for k in range(N)])

```

```

W2_SDE = [W2(lamb_SDE_t(lamb,T-t),lamb_Sigma_t(lamb,T-t)) for t in tk]
W2_SDE.reverse()
W2_ODE = [W2(lamb_ODE_t(lamb,T-t),lamb_Sigma_t(lamb,T-t)) for t in tk]
W2_ODE.reverse()

plt.semilogy(tk,W2_SDE, '-',label='SDE',color='tab:purple')
plt.semilogy(tk,W2_ODE, '-',label='ODE',color='k')

das = (3,2)
plt.semilogy(tk,W2_EM(N,lamb), '--',label='EM',dashes=das,color='C0')
plt.semilogy(tk,W2_EI(N,lamb), '--',label='EI',dashes=das,color='tab:green')
plt.semilogy(tk,W2_Euler(N,lamb), '--',label='Euler',dashes=das,color='tab:
↪orange')
plt.semilogy(tk,W2_Heun(N,lamb), '--',label='Heun',dashes=das,color='tab:red')

plt.ylabel('$\mathbf{W}_2(\cdot,p_t)$')
axes = plt.gca()
axes.xaxis.set_ticks([0,0.2,0.4,0.6,0.8,1.0])
axes.xaxis.set_ticklabels(["0","0.2","0.4","0.6","0.8",r"$\mathrm{T} = 1$"])

plt.xlabel('Time $t$')

plt.legend( ncol=3,fontsize='x-small')

plt.show()

plt.savefig(PATH_output+'discretization_initialization_error.pdf',
↪bbox_inches='tight', dpi=100)

```

/var/folders/59/32mlzt9101s96\_s3bpqbffvr0000gp/T/ipykernel\_38314/1759821661.py:2

3: RuntimeWarning: divide by zero encountered in divide

```

    lamb_Heun =(1+ Delta_t/2*beta_T_tk*(1-1/lamb_T_tk)+Delta_t/2*beta_T_tk_1*(1-
1/lamb_T_tk_1)*(1+Delta_t*beta_T_tk*(1-1/lamb_T_tk)))*2*lamb_Heun

```

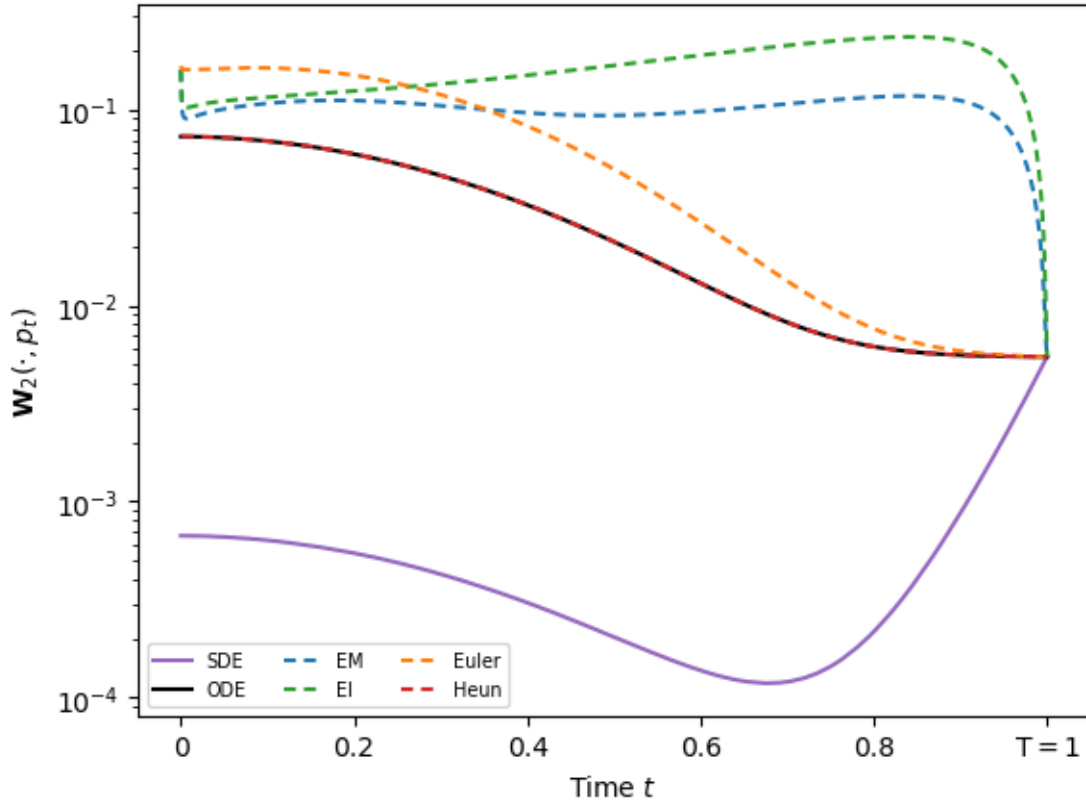

<Figure size 640x480 with 0 Axes>

### 6.0.2 Truncation

```
[15]: eps_list_graph = [0,10**-5,10**-4,10**-3,10**-2]

W2_eps_EM = []
W2_eps_EI = []
W2_eps_Euler = []
W2_eps_Heun = []
W2_eps_SDE = []
W2_eps_ODE = []

N = 1000

eps_list_graph = [0,10**-5,10**-4,10**-3,10**-2]
for t_eps in eps_list_graph :
    W2_eps_EM.append(W2_EM(N,lamb,t_eps,all_t=False))
    W2_eps_EI.append(W2_EI(N,lamb,t_eps,all_t=False))
    W2_eps_Euler.append(W2_Euler(N,lamb,t_eps,all_t=False))
    W2_eps_Heun.append(W2_Heun(N,lamb,t_eps,all_t=False))
```

```
W2_eps_SDE.append(W2(lamb_SDE_t(lamb,t_eps),lamb_Sigma_t(lamb,0)))
W2_eps_ODE.append(W2(lamb_ODE_t(lamb,t_eps),lamb_Sigma_t(lamb,0)))
```

```
/var/folders/59/32mlzt9101s96_s3bpqbffvr0000gp/T/ipykernel_38314/1759821661.py:2
3: RuntimeWarning: divide by zero encountered in divide
    lamb_Heun =(1+ Delta_t/2*beta_T_tk*(1-1/lamb_T_tk)+Delta_t/2*beta_T_tk_1*(1-
1/lamb_T_tk_1)*(1+Delta_t*beta_T_tk*(1-1/lamb_T_tk)))*2*lamb_Heun
```

```
[16]: plt.figure()

T_eps_plot = [10**-6,10**-5,10**-4,10**-3,10**-2]
#The 'zero eps' is plotted at 10**-6 to enable the loglog setting

plt.loglog(T_eps_plot,W2_eps_SDE,'-x',label='SDE',color='tab:purple')
plt.loglog(T_eps_plot,W2_eps_ODE,'-x',label='ODE',color='k')
das = (3,2)
plt.loglog(T_eps_plot,W2_eps_EM,'--x',label='EM',dashes=das,color='C0')
plt.loglog(T_eps_plot,W2_eps_EI,'--x',label='EI',dashes=das,color='tab:green')
plt.loglog(T_eps_plot,W2_eps_Euler,'--x',label='Euler',dashes=das,color='tab:
↪orange')
plt.loglog(T_eps_plot,W2_eps_Heun,'--x',label='Heun',dashes=das,color='tab:red')

#plt.legend()
axes = plt.gca()
axes.xaxis.set_ticks(T_eps_plot)
axes.xaxis.set_ticklabels([str(t_eps) for t_eps in eps_list_graph])
plt.ylabel('$\mathbf{W}_2(\cdot,p_0)$')

plt.xlabel(r'Truncation time $\varepsilon$')

plt.legend(ncol=3,fontsize='x-small')

plt.show()

plt.savefig(PATH_output+'truncation_error.pdf', bbox_inches='tight', dpi=100)
```

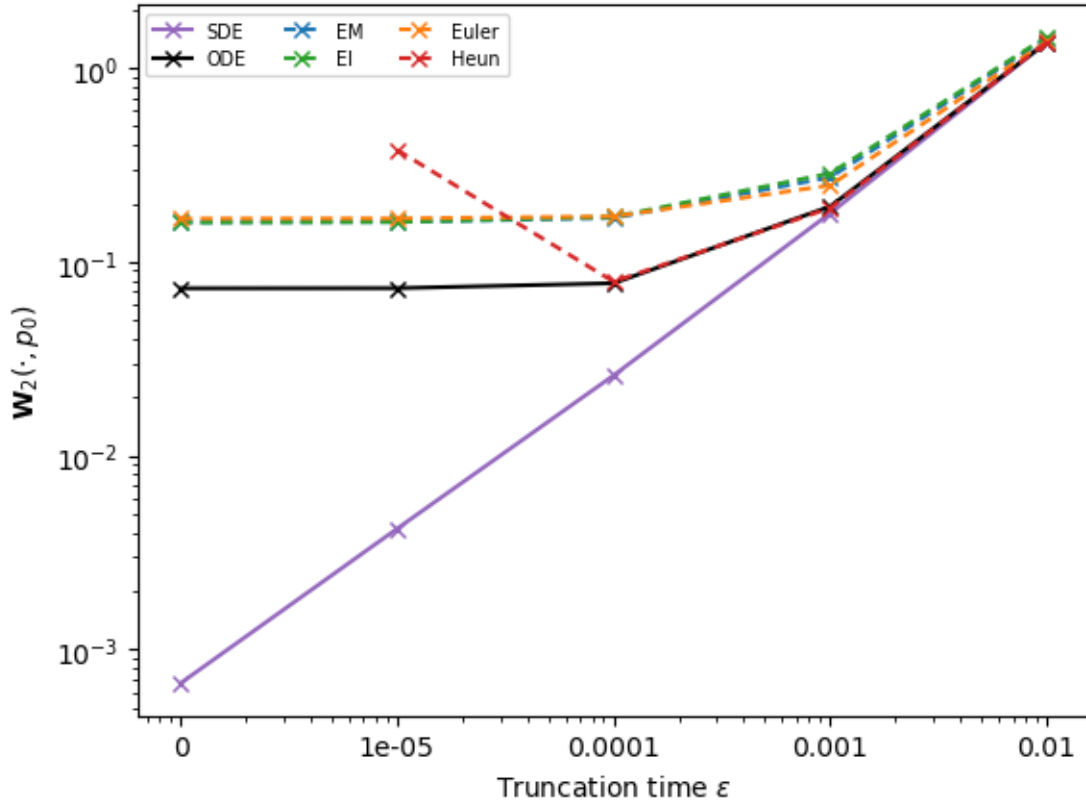

<Figure size 640x480 with 0 Axes>

## 6.1 Two graphs with the same scale

```
[17]: plt.figure(figsize=(10,4))
plt.subplot(1,2,1)
plt.semilogy(tk,W2_SDE,'-',label='SDE',color='tab:purple')
plt.semilogy(tk,W2_ODE,'-',label='ODE',color='k')

das = (3,2)
plt.semilogy(tk,W2_EM(N,lamb),'--',label='EM',dashes=das,color='C0')
plt.semilogy(tk,W2_EI(N,lamb),'--',label='EI',dashes=das,color='tab:green')
plt.semilogy(tk,W2_Euler(N,lamb),'--',label='Euler',dashes=das,color='tab:
↪orange')
plt.semilogy(tk,W2_Heun(N,lamb),'--',label='Heun',dashes=das,color='tab:red')

plt.ylabel('$\mathbf{W}_2(\cdot,p_t)$')
axes = plt.gca()
axes.xaxis.set_ticks([0,0.2,0.4,0.6,0.8,1.0])
axes.xaxis.set_ticklabels(["0","0.2","0.4","0.6","0.8",r"$\mathrm{T} = 1$"])
```

```

plt.xlabel('Time $t$')

plt.legend( ncol=3,fontsize='x-small')

plt.subplot(1,2,2,sharey=axes)

T_eps_plot = [10**-6,10**-5,10**-4,10**-3,10**-2]

plt.loglog(T_eps_plot,W2_eps_SDE,'-x',label='SDE',color='tab:purple')
plt.loglog(T_eps_plot,W2_eps_ODE,'-x',label='ODE',color='k')
das = (3,2)
plt.loglog(T_eps_plot,W2_eps_EM,'--x',label='EM',dashes=das,color='C0')
plt.loglog(T_eps_plot,W2_eps_EI,'--x',label='EI',dashes=das,color='tab:green')
plt.loglog(T_eps_plot,W2_eps_Euler,'--x',label='Euler',dashes=das,color='tab:
↪orange')
plt.loglog(T_eps_plot,W2_eps_Heun,'--x',label='Heun',dashes=das,color='tab:red')

axes = plt.gca()
axes.xaxis.set_ticks(T_eps_plot)
axes.xaxis.set_ticklabels([str(t_eps) for t_eps in eps_list_graph])
plt.ylabel('$\mathbf{W}_2(\cdot,p_0)$')

plt.xlabel(r'Truncation time $\varepsilon$')

plt.legend(ncol=3,fontsize='x-small')

plt.show()

plt.savefig(PATH_output+'truncation_discretization_initialization.pdf',
↪bbox_inches='tight', dpi=100)

```

```

/var/folders/59/32mlzt9101s96_s3bpqbffvr0000gp/T/ipykernel_38314/1759821661.py:2
3: RuntimeWarning: divide by zero encountered in divide
    lamb_Heun =(1+ Delta_t/2*beta_T_tk*(1-1/lamb_T_tk)+Delta_t/2*beta_T_tk_1*(1-
1/lamb_T_tk_1)*(1+Delta_t*beta_T_tk*(1-1/lamb_T_tk)))*2*lamb_Heun

```

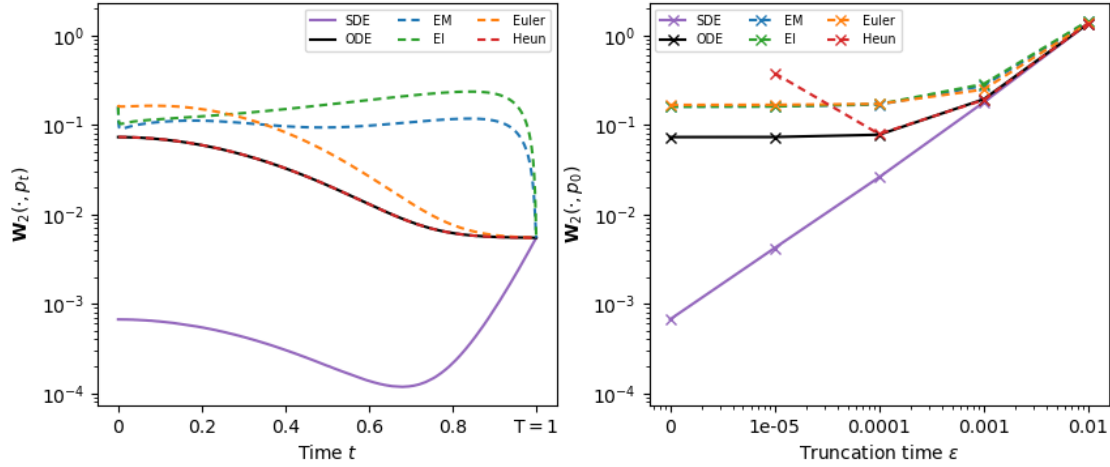

<Figure size 640x480 with 0 Axes>

## 7 Ablation study table

The following code displays the table corresponding to Table 2 of [1].

```
[18]: N_list = [50,250,500,1000] #500
eps_list = [0., 10**-5,10**-4,10**-3]
P_T = [True,False]
schemes_list = ['EM','EI','Euler','Heun']

W2_dict = {scheme: {str(p_T):{} for p_T in P_T} for scheme in schemes_list}
W2_dict['SDE'] = {str(p_T):{} for p_T in P_T}
W2_dict['ODE'] = {str(p_T):{} for p_T in P_T}
#Continuous integration

for scheme in ['SDE','ODE'] :
    if scheme == 'SDE' :
        lamb_func_t = lamb_SDE_t
    elif scheme == 'ODE' :
        lamb_func_t = lamb_ODE_t
    for t_eps in eps_list :
        W2_dict[scheme]['False'][str(t_eps)] = \
        ↪W2(lamb_func_t(lamb,t_eps),lamb_Sigma_t(lamb,0))
        W2_dict[scheme]['True'][str(t_eps)] = \
        ↪W2(lamb_Sigma_t(lamb,t_eps),lamb_Sigma_t(lamb,0))
```

```

for scheme in schemes_list :

    if scheme == 'EM' :
        W2_funct = W2_EM
    elif scheme == 'EI' :
        W2_funct = W2_EI
    elif scheme == 'Euler' :
        W2_funct = W2_Euler
    elif scheme == 'Heun' :
        W2_funct = W2_Heun
    for p_T in P_T :
        for N in N_list :
            W2_dict[scheme][str(p_T)][str(N)] = {}
            for t_eps in eps_list :
                W2_dict[scheme][str(p_T)][str(N)][str(t_eps)] = _
            ↪W2_funct(N,lamb,t_eps=t_eps,p_T = p_T ,all_t=False)

```

```

/var/folders/59/32mlzt9101s96_s3bpqbffvr0000gp/T/ipykernel_38314/1759821661.py:2
3: RuntimeWarning: divide by zero encountered in divide
    lamb_Heun =(1+ Delta_t/2*beta_T_tk*(1-1/lamb_T_tk)+Delta_t/2*beta_T_tk_1*(1-
1/lamb_T_tk_1)*(1+Delta_t*beta_T_tk*(1-1/lamb_T_tk)))*2*lamb_Heun

```

### 7.0.1 Markdown table

In the following, the table is displayed in the notebook via Markdown.

```

[19]: def formatting_number(x) :
        if x == 0 :
            str_x = '0'
        elif x == np.inf :
            str_x = '-'
        elif np.log10(x).is_integer() :
            str_x = '10^{'+str(int(np.log10(x)))+'}'
        elif x > 10**2 :
            str_x = '{:1.1E}'.format(x)
        elif x < 10**-2 :
            str_x = '{:1.1E}'.format(x)
        else :
            str_x = '{:1.2f}'.format(x)
        return str_x

```

```

[20]: table_Markdown = '|||'
table_Markdown += ' Continuous||'

for N in N_list :
    table_Markdown += ' N = ' +str(N)+'|||'

table_Markdown += '\n'

```

```

table_Markdown += ' |:---: |:---: |:---: |:---: |'
for N in N_list :
    table_Markdown += ':---: |:---: |'

table_Markdown += '\n'

table_Markdown += ' |||$p_T$|$\mathcal{N}_0$| '
for N in N_list :
    table_Markdown += '$p_T$|$\mathcal{N}_0$| '

table_Markdown += '\n'

for scheme in schemes_list :
    table_Markdown += '|' + scheme + '|'
    for t_eps in eps_list :
        if t_eps != eps_list[0] :
            table_Markdown += '||'
            table_Markdown += r'$\varepsilon = ' + formatting_number(t_eps) + '$| '
            if scheme in ['EM', 'EI'] :
                table_Markdown += ␣
                ↪formatting_number(W2_dict['SDE']['True'][str(t_eps)]) + '|'
                table_Markdown += ␣
                ↪formatting_number(W2_dict['SDE']['False'][str(t_eps)]) + '|'
                if scheme in ['Euler', 'Heun'] :
                    table_Markdown += ␣
                    ↪formatting_number(W2_dict['ODE']['True'][str(t_eps)]) + '|'
                    table_Markdown += ␣
                    ↪formatting_number(W2_dict['ODE']['False'][str(t_eps)]) + '|'
                for N in N_list :
                    table_Markdown += ␣
                    ↪formatting_number(W2_dict[scheme]['True'][str(N)][str(t_eps)]) + '|'
                    table_Markdown += ␣
                    ↪formatting_number(W2_dict[scheme]['False'][str(N)][str(t_eps)]) + '|'
                table_Markdown += '\n'

Markdown(table_Markdown)

```

[20] :

|            |                   |       |                 | N =   |                 | N =   |                 | N =   |                 | N =   |                 |
|------------|-------------------|-------|-----------------|-------|-----------------|-------|-----------------|-------|-----------------|-------|-----------------|
| Continuous |                   |       |                 | 50    |                 | 250   |                 | 500   |                 | 1000  |                 |
|            |                   | $p_T$ | $\mathcal{N}_0$ |
| EM         | $\varepsilon = 0$ | 0     | 6.7E-04         | 4.78  | 4.78            | 0.65  | 0.66            | 0.32  | 0.32            | 0.16  | 0.16            |

|       |                         | Continuous |         | N =<br>50 |       | N =<br>250 |      | N =<br>500 |      | N =<br>1000 |      |
|-------|-------------------------|------------|---------|-----------|-------|------------|------|------------|------|-------------|------|
| EI    | $\varepsilon = 10^{-5}$ | 4.1E-03    | 4.2E-03 | 4.77      | 4.77  | 0.66       | 0.66 | 0.32       | 0.32 | 0.16        | 0.16 |
|       | $\varepsilon = 10^{-4}$ | 0.03       | 0.03    | 4.76      | 4.76  | 0.66       | 0.66 | 0.32       | 0.32 | 0.17        | 0.17 |
|       | $\varepsilon = 10^{-3}$ | 0.18       | 0.18    | 4.68      | 4.68  | 0.70       | 0.70 | 0.40       | 0.40 | 0.27        | 0.27 |
|       | $\varepsilon = 0$       | 0          | 6.7E-04 | 2.81      | 2.81  | 0.57       | 0.57 | 0.30       | 0.30 | 0.16        | 0.16 |
|       | $\varepsilon = 10^{-5}$ | 4.1E-03    | 4.2E-03 | 2.81      | 2.81  | 0.57       | 0.57 | 0.30       | 0.30 | 0.16        | 0.16 |
| Euler | $\varepsilon = 10^{-4}$ | 0.03       | 0.03    | 2.82      | 2.82  | 0.58       | 0.58 | 0.31       | 0.31 | 0.17        | 0.17 |
|       | $\varepsilon = 10^{-3}$ | 0.18       | 0.18    | 2.91      | 2.91  | 0.67       | 0.67 | 0.41       | 0.41 | 0.29        | 0.29 |
|       | $\varepsilon = 0$       | 0          | 0.07    | 1.72      | 1.78  | 0.38       | 0.44 | 0.20       | 0.26 | 0.10        | 0.17 |
|       | $\varepsilon = 10^{-5}$ | 4.1E-03    | 0.07    | 1.72      | 1.78  | 0.38       | 0.44 | 0.20       | 0.26 | 0.10        | 0.17 |
|       | $\varepsilon = 10^{-4}$ | 0.03       | 0.08    | 1.72      | 1.78  | 0.38       | 0.44 | 0.20       | 0.26 | 0.11        | 0.17 |
| Heun  | $\varepsilon = 10^{-3}$ | 0.18       | 0.19    | 1.73      | 1.79  | 0.42       | 0.48 | 0.27       | 0.32 | 0.21        | 0.25 |
|       | $\varepsilon = 0$       | 0          | 0.07    | -         | -     | -          | -    | -          | -    | -           | -    |
|       | $\varepsilon = 10^{-5}$ | 4.1E-03    | 0.07    | 23.42     | 23.42 | 2.86       | 2.87 | 1.05       | 1.06 | 0.37        | 0.38 |
|       | $\varepsilon = 10^{-4}$ | 0.03       | 0.08    | 4.68      | 4.68  | 0.43       | 0.44 | 0.12       | 0.14 | 0.03        | 0.08 |
|       | $\varepsilon = 10^{-3}$ | 0.18       | 0.19    | 0.58      | 0.59  | 0.13       | 0.15 | 0.16       | 0.18 | 0.17        | 0.19 |

### 7.0.2 Tex table

In the following, a table.tex is created and compiled (if pdflatex is available) to obtain Table 2 of [1].

```
[21]: output_tex = PATH_output + 'table.tex'

#preamble
table_tex = r'\documentclass{article}' + '\n'
table_tex += '\n'
table_tex += r'\usepackage{booktabs}' + '\n'
table_tex += r'\usepackage{multirow}' + '\n'
table_tex += r'\usepackage{graphicx}' + '\n'
table_tex += '\n'
table_tex += r'\begin{document}' + '\n'
table_tex += '\n'
```

```

#Table
table_tex += r'\begin{table}' + '\n'
table_tex += r'\centering' + '\n'
table_tex += r'\begin{tabular}' + '\n'
table_tex += 'l'*(len(N_list)*len(P_T)+4) + '}' + '\n'
table_tex += r'\toprule' + '\n'

table_tex += r'&'
table_tex += r' &\multicolumn{2}{c}{Continuous}' + '\n'

for N in N_list :
    table_tex += r'& \multicolumn{2}{c}{\$N = '+str(N)+ r'$}' + '\n'

table_tex += r'\\' + '\n'

for k in range(2,len(N_list)*len(P_T)+4,2) :
    table_tex += r'\cmidrule(lr){'+str(k+1) + '-' + str(k+2)+ r'}' + '\n'

table_tex += r'& &$p_T$ & $\mathcal{N}_0$ & ' + '\n'
for N in N_list :
    if N == N_list[-1] :
        table_tex += r'$p_T$ & $\mathcal{N}_0$ \\\' + '\n'
    else :
        table_tex += r'$p_T$ & $\mathcal{N}_0$ & ' + '\n'

table_tex += r'\midrule' + '\n'

for scheme in schemes_list :
    table_tex += \_
    ↪ r'\parbox[t]{2mm}{\multirow{4}{*}{\rotatebox[origin=c]{90}{'+scheme+r'}}}}' + \_
    ↪ '\n'
    #Continuous column
    for t_eps in eps_list :
        table_tex += r'& \multicolumn{1}{|l|}{\$varepsilon =\_
        ↪ '+formatting_number(t_eps)+'$}\n'

        if scheme in ['EM','EI'] :
            table_tex += ' &\_
            ↪ '+formatting_number(W2_dict['SDE']['True'][str(t_eps))+'\n'
            table_tex += ' &\_
            ↪ '+formatting_number(W2_dict['SDE']['False'][str(t_eps))+'\n'
            if scheme in ['Euler','Heun'] :
                table_tex += ' &\_
                ↪ '+formatting_number(W2_dict['ODE']['True'][str(t_eps))+'\n'
                table_tex += ' &\_
                ↪ '+formatting_number(W2_dict['ODE']['False'][str(t_eps))+'\n'

```

```

        for N in N_list :
            table_tex += ' &␣
↪'+formatting_number(W2_dict[scheme]['True'][str(N)][str(t_eps))]+\n'
            table_tex += ' &␣
↪'+formatting_number(W2_dict[scheme]['False'][str(N)][str(t_eps))]+\n'
            table_tex += r'\\' + '\n'

table_tex += r'\bottomrule' + '\n'
table_tex += r'\end{tabular}' + '\n'
table_tex += r'\end{table}' + '\n'

table_tex += r'\end{document}'

if os.path.exists(output_tex) :
    os.remove(output_tex)

f = open(output_tex, "a")
f.write(table_tex)
f.close()

```

The following cell compiles the file .tex if latex is available.

```

[ ]: from distutils.spawn import find_executable
if find_executable('latex'):
    os.system('pdflatex -v '+output_tex)

```

## 8 Bibliography

- [1] (2024). Diffusion models for Gaussian distributions: Exact solutions and Wasserstein errors. Preprint.
- [2] [Yang Song, Jascha Sohl-Dickstein, Diederik P. Kingma, Abhishek Kumar, Stefano Ermon, Ben Poole \(2021\). Score-Based Generative Modeling through Stochastic Differential Equations. ICLR](#)

[ ]:
